# Supplementary material
Source: PubMed Central journal article supplement (PMC4959970)
Supplement: NIHMS748641-supplement-Supplemental_Tables_1A__1B__2A__and_2B.pdf [file NIHMS748641-supplement-Supplemental_Tables_1A__1B__2A__and_2B.pdf]

Supplementary Table 1A

Probability of smoking onset by T2 as a function of level of e-cigarette use at T1, with odds ratios and 95% confidence intervals

| <u>Level of T1 e-cigarette use</u> | <u>Pr{onset}</u> | <u>Odds ratio</u> | <u>Confidence interval</u> | <u>p</u> |
|------------------------------------|------------------|-------------------|----------------------------|----------|
| Never                              | 2%               | 1.00              |                            |          |
| 1-2 times                          | 5%               | 2.58              | 1.24 - 5.34                | .01      |
| 3-4 times                          | 7%               | 3.89              | 1.28 - 11.77               | .02      |
| Yearly/monthly                     | 9%               | 5.08              | 1.88 - 13.73               | .001     |
| Weekly/daily                       | 9%               | 5.30              | 2.12 - 13.28               | .0004    |

Note: Analysis conducted for T1 never smokers, analytic  $N = 1,070$ . Criterion variable is defined as categories 0 or 1 (never smoked or smoked 1-2 times) at T2 vs. category 2 (smoked 3-4 times) or higher at T2. Cells for the highest levels of use are collapsed to avoid small cell sizes. Results are adjusted for demographics, parenting, and personality variables and for clustering within school.

Supplementary Table 1B

Probability of smoking onset by T2 as a function of level of e-cigarette use at T1, with odds ratios and 95% confidence intervals

| <u>Level of T1 e-cigarette use</u> | <u>Pr{onset}</u> | <u>Odds ratio</u> | <u>Confidence interval</u> | <u>p</u> |
|------------------------------------|------------------|-------------------|----------------------------|----------|
| Never                              | 2%               | 1.00              |                            |          |
| 1-2 times                          | 2%               | 1.94              | 0.68 - 5.51                | n.s.     |
| 3-4 times                          | 2%               | 1.21              | 0.22 - 6.78                | n.s.     |
| Yearly/monthly                     | 5%               | 4.37              | 1.79 - 10.65               | .001     |
| Weekly/daily                       | 13%              | 11.41             | 5.76 - 22.63               | <.0001   |

Note: Analysis conducted for T1 never smokers, analytic  $N = 1,070$ . Criterion variable is Defined as categories 0-2 (Never smoked to smoked 3-4 times) at T2 vs. category 3 (smoke yearly) or higher at T2. Cells for the highest levels of use are collapsed to avoid small cell sizes. Results are adjusted for demographics, parenting, and personality variables and for clustering within school.

Supplementary Table 1C

Probability of smoking onset by T2 as a function of level of e-cigarette use at T1, with odds ratios and 95% confidence intervals

| <u>Level of T1 e-cigarette use</u> | <u>Pr{onset}</u> | <u>Odds ratio</u> | <u>Confidence interval</u> | <u>p</u> |
|------------------------------------|------------------|-------------------|----------------------------|----------|
| Never                              | 1%               | 1.00              |                            |          |
| 1-2 times                          | 1%               | 1.88              | 0.22- 15.70                | n.s.     |
| 3-4 times                          | 1%               | 1.61              | 0.12 - 20.75               | n.s.     |
| Yearly/monthly                     | 4%               | 7.13              | 1.28 - 39.73               | .03      |
| Weekly/daily                       | 10%              | 17.19             | 7.24 - 40.79               | <.0001   |

Note: Analysis conducted for T1 never smokers, analytic  $N = 1,070$ . Criterion variable is Defined as categories 0-3 (Never smoked to smoked yearly) at T2 vs. category 4 (smoke monthly) or higher at T2. Cells for the highest levels of use are collapsed to avoid small cell sizes. Results are adjusted for demographics, parenting, and personality variables and for clustering within school.

Supplemental Table 2A

Odds ratio and probability of being a T2 smoker among T1 nonsmokers as a function of alternate definition #1, for complete-case analysis and full-information analysis

| <u>For complete-case analysis</u>    |                                         |                   |                            |                 |
|--------------------------------------|-----------------------------------------|-------------------|----------------------------|-----------------|
| <u>T1 e-cig definition</u>           | <u>Prob. of {T2 Smoker}<sup>A</sup></u> | <u>Odds ratio</u> | <u>Confidence interval</u> | <u><i>p</i></u> |
| Non-regular user T1 <sup>A</sup>     | 2%                                      | 1.00              |                            |                 |
| Regular user T1 <sup>A</sup>         | 8%                                      | 3.60              | 1.59 - 8.16                | .002            |
| <u>For full-information analysis</u> |                                         |                   |                            |                 |
| <u>T1 e-cig definition</u>           | <u>Prob. of {T2 Smoker}<sup>A</sup></u> | <u>Odds ratio</u> | <u>Confidence interval</u> | <u><i>p</i></u> |
| Non-regular user at T1 <sup>A</sup>  | 3%                                      | 1.00              |                            |                 |
| Regular user at T1 <sup>A</sup>      | 9%                                      | 3.45              | 2.09 - 5.69                | <.0001          |

*Note:* Regression model includes T1 e-cigarette use, age, gender, ethnicity, parental education, parental support, and rebelliousness. <sup>A</sup> Defined as first two scale points (never smoked or smoked 1-2 times) vs. upper 5 scale points (smoked 3-4 times or more often).

Supplemental Table 2B

Odds ratio and probability of being a T2 smoker among T1 nonsmokers as a function of alternate definition #2, for complete-case analysis and full-information analysis

| <u>For complete-case analysis</u>    |                             |                   |                            |          |
|--------------------------------------|-----------------------------|-------------------|----------------------------|----------|
| <u>T1 e-cig definition</u>           | <u>Prob. of {T2 Smoker}</u> | <u>Odds ratio</u> | <u>Confidence interval</u> | <u>p</u> |
| Non-regular user T1 <sup>B</sup>     | 1%                          | 1.00              |                            |          |
| Regular user T1 <sup>B</sup>         | 7%                          | 6.01              | 3.16 - 11.42               | <.0001   |
| <u>For full-information analysis</u> |                             |                   |                            |          |
| <u>T1 e-cig definition</u>           | <u>Prob. of {T2 Smoker}</u> | <u>Odds ratio</u> | <u>Confidence interval</u> | <u>p</u> |
| Non-regular user at T1 <sup>B</sup>  | 1%                          | 1.00              |                            |          |
| Regular user at T1 <sup>B</sup>      | 7%                          | 6.36              | 3.10 - 13.08               | <.0001   |

*Note:* Regression model includes T1 e-cigarette use, gender, ethnicity, parental education, parental support, and rebelliousness. <sup>B</sup> Defined as first three scale points (never smoked, smoked 1-2 times, smoked 3-4 times) vs. upper 4 scale points (smoke yearly, monthly, or daily) .
